# Supplementary material
Source: Springer Nature journal article supplement (https://www.springermedizin.de/resource/supplementary/12961_2008_80_MOESM3_ESM.pdf/9571432)
Supplement: MOESM3 [file 9571432]

Socio-economic/  
Political context

Improved health  
status

Impact

Improved  
performance/service  
delivery

Effects

Contributing to

Increased  
availability

Increased productivity/  
responsiveness

Improved  
competence

Outcomes

Examples:  
Increased number  
of staff  
Improved equitable  
staff distribution  
Improved skills mix  
Improved retention  
Reduced absence

Examples:  
Improved working  
conditions  
Improved  
motivation and job  
satisfaction  
Reduced absence  
Feeling obliged to  
change towards  
clients, colleagues  
and/or managers

Improved skills,  
knowledge and  
attitudes

Outputs

HRM interventions to improve availability, productivity, responsiveness and competencies:  
job related, support system/ enabling environment

Process

Resources: Human, financial and material

Inputs

Sub optimal performance

Determinants at macro  
level: health system  
level

Determinants at micro  
level: workplace or  
health facility level

Determinants at  
individual level: living  
circumstances

Situational  
Analysis
